# Supplementary material for: Evaluating the Biocompatibility of an Injectable Wound Matrix in a Murine Model
Source: MDPI journal article supplement (doi:10.3390/gels8010049), 2022-01-09
Supplement: s1 [file s1]

Supplementary Material:

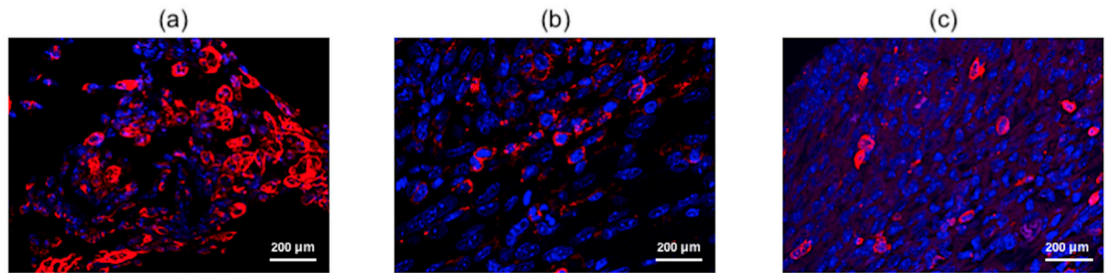

Supplementary Figure S1. Immunofluorescence staining of the cellular capsule surrounding GCBP during the first two weeks following application. (a) Vim+, (b) CD45+, and (c) CD3+ cells. Scale bars = 200  $\mu\text{m}$ .
